# Supplementary material
Source: Research Square preprint supplement (doi:10.21203/rs.3.rs-8605405/v1)
Supplement: Supplementary file 1 [file 0bb379c52fce682d86dfc62a.docx]

**Supplementary Information**

**S1:** Survey Questionnaire (Arabic)

| 1. **Demographic factors**   العوامل الديموغرافية |
| --- |
| العمر  أقل من 18 من 18-30 31-40 41-50 أكثر من 50 |
| المحافظة  رفح خانيونس دير البلح غزة الشمال |
| المستوى التعليمي للسيدة  ابتدائي ثانوي بكالوريوس ماجستير غيرة |
| المستوى التعليمي للزوج  ابتدائي ثانوي بكالوريوس ماجستير غيرة |
| هل تعملي  نعم لا |
| هل زوجك يعمل  نعم لا |
| معدل الدخل الشهري  اقل من 1000 شيقل من 1000-1500 شيقل 1600-2000 شيقل أكثر من 2000 شيقل |
| عدد الولادات السابقة...............؟  عدد الحمولات السابقة ...............؟  عدد حالات الإجهاض...............؟ |
| **كم عدد الأطفال الأحياء لديكِ حاليًا؟ ....................** |
| **كم مضى على زواجك؟**  أقل من سنة من 1-5 سنوات من 6-10 سنوات أكثر من 10 سنوات |
| **هل سبق لك استخدام وسائل منع الحمل من قبل؟**  نعم لا |
| **هل لديكِ تأمين صحي؟**  نعم لا |
| **هل تعانين من أي حالة صحية مزمنة تؤثر على قرار استخدام وسائل منع الحمل؟**  نعم لا |
| **المدة الزمنية لاستخدام وسيلة منع الحمل**  **لا استخدمها أقل من سنة من 1-3 سنوات أكثر من 3 سنوات** |

1. **Factors affecting women's access, utilization and compliance to FP methods**

عوامل تؤثر على الوصول، الاستخدام والامتثال لوسائل تنظيم الأسرة بين السيدات

|  |  |  |
| --- | --- | --- |
| لا | نعم | العناصر |
|  |  | هل تستشيري زوجك قبل البدء في الاستخدام |
|  |  | هل يعتبر الزوج عامل قوي في استخدام أساليب تنظيم الأسرة |
|  |  | هل يؤثر العامل الديني على الاستخدام، الوصول والامتثال لأساليب تنظيم الأسرة |
|  |  | أنتي تهتمي بإن زوجك من ضروري أن يوافق على طريقة التي يتم اختيارها |
|  |  | هل من المقبول إن تختاري طريقة لوسيلة منع الحمل دون إخبار زوجك |
|  |  | هل أنتي خائفة من مضاعفات استخدام أساليب تنظيم الأسرة |
|  |  | هل سبق لك أن واجهت اي مضاعفات بعد استخدام موانع الحمل |
|  |  | هل يؤثر وسائل تنظيم الأسرة على الجماع |
|  |  | هل قلة المعرفة والوعي بأهمية وسائل منع الحمل تؤثر سلبا عليك وتجعلك لا تستخدمي لا تستخدمي أساليب تنظيم الأسرة |
|  |  | سوء المعاملة من قبل مقدمي الخدمات (الممرضات والقابلات) عامل يؤثر على استخدام موانع الحمل |
|  |  | هل يؤثر مستوى الدعم وتشجيع من قبل مقدمي الرعاية الصحية على الامتثال لأساليب تنظيم الأسرة |
|  |  | هل تؤثر الاثار الجانبية التي يمكن أن تسببها استخدام موانع الحمل على امتثال المرأة |
|  |  | وسائل منع الحمل في منطقتك سهل؟ |
|  |  | هل تعتبر تكلفة وسائل منع الحمل عاملاً مؤثراً على قرارك باستخدامها؟ |
|  |  | هل تجدين صعوبة في الحصول على استشارة طبية حول وسائل منع الحمل؟ |
|  |  | هل هناك أوقات انتظار طويلة للحصول على خدمات تنظيم الأسرة؟ |
|  |  | هل تشعرين بأن لديكِ الحرية الكاملة في اتخاذ قرار استخدام وسائل منع الحمل؟ |
|  |  | هل هناك ضغوط اجتماعية أو عائلية تؤثر على قرارك باستخدام وسائل منع الحمل؟ |
|  |  | هل تشعرين بالقلق أو التوتر عند التفكير في استخدام وسائل منع الحمل بسبب آثارها الجانبية المحتملة؟ |
|  |  | هل تجدين صعوبة في الاستمرار باستخدام وسيلة منع الحمل لفترة طويلة؟ |
|  |  | هل سبق وأن توقفتِ عن استخدام وسيلة منع الحمل بسبب عدم الرضا عنها؟ |
|  |  | هل تشعرين أن مقدمي الرعاية الصحية يوفرون لكِ المعلومات الكافية عن وسائل منع الحمل؟ |
|  |  | هل تجدين أن مستوى التثقيف الصحي المتاح حول وسائل منع الحمل غير كافٍ؟ |
|  |  | هل تشعرين بأن المجتمع المحيط بكِ يدعم استخدام وسائل تنظيم الأسرة؟ |

1. **Assessing the level of access to FP methods**

| تقييم مستوى الوصول إلى وسائل تنظيم الأسرة | | | |  |  |
| --- | --- | --- | --- | --- | --- |
| العناصر | موافق بشدة | موافق | محايد | غير موافق | غير موافق  بشدة |
| أجد أنه من السهل الوصول إلى وسائل منع الحمل الهرمونية (مثل الحبوب واللصقات والغرسات). |  |  |  |  |  |
| أجد أنه من السهل الوصول إلى وسائل منع الحمل الحاجزة (مثل الواقي الذكري والحاجز المهبلي). |  |  |  |  |  |
| أجد أنه من السهل الوصول إلى طرق الوقاية العكسية (مثل اللولب الرحمي والغرسات). |  |  |  |  |  |
| أجد أنه من السهل الوصول إلى وسيلة منع الحمل المناسبة لعادات وتقاليد المجتمع. |  |  |  |  |  |
| أجد أنه من السهل الوصول إلى وسيلة منع الحمل المناسبة لعمري |  |  |  |  |  |
| أجد أنه من السهل الوصول إلى وسائل منع الحمل من مقدم الرعاية الصحية |  |  |  |  |  |
| أجد أنه من السهل الوصول إلى وسائل منع الحمل من العيادات التي تقدم خدمات تنظيم الأسرة. |  |  |  |  |  |
| أجد أنه من السهل الوصول إلى وسيلة منع الحمل التي أريدها. |  |  |  |  |  |
| أجد أنه من السهل الحصول على وسيلة منع الحمل التي تناسب نمط حياتي |  |  |  |  |  |
| أعتقد أن وسائل تنظيم الأسرة بالنسبة لي تختلف حسب وضعي الاجتماعي |  |  |  |  |  |
| أعتقد أن وسائل تنظيم الأسرة بالنسبة لي تختلف حسب وضعي الاقتصادي |  |  |  |  |  |
| إن توافر وسائل منع الحمل التي يريدها زوجي يساعدنا على تحسين العلاقة الجنسية وتحقيق العدد المطلوب من الأطفال |  |  |  |  |  |
| إن الوصول إلى وسائل تنظيم الأسرة له نتائج مرضية بالنسبة لي ولزوجي في تحسين الصحة الإنجابية والعامة |  |  |  |  |  |
| إن الوصول إلى وسائل تنظيم الأسرة التي تناسب حالتي الصحية متاح دائمًا |  |  |  |  |  |
| **من السهل الحصول على استشارة من مقدمي الرعاية الصحية حول الوسيلة الأفضل لي** |  |  |  |  |  |
| **هناك توعية كافية في المجتمع حول وسائل تنظيم الأسرة المتاحة** |  |  |  |  |  |
| **أجد أن تكلفة وسائل منع الحمل مناسبة ويمكنني تحملها** |  |  |  |  |  |
| **أشعر أن الخصوصية محفوظة عند استخدامي لوسائل تنظيم الأسرة في المرافق الصحية** |  |  |  |  |  |
| **أجد أن وسائل تنظيم الأسرة متاحة بسهولة حتى في حالات الطوارئ أو الاحتياج العاجل** |  |  |  |  |  |
| **أعتقد أن وسائل تنظيم الأسرة الحديثة (مثل التطبيقات التكنولوجية) متاحة بشكل كافٍ ويمكن الوصول إليها** |  |  |  |  |  |
| **أشعر أن المجتمع من حولي يدعم استخدامي لوسائل تنظيم الأسرة** |  |  |  |  |  |
| **المؤسسات الدينية تقدم دعمًا كافيًا للوصول إلى وسائل تنظيم الأسرة** |  |  |  |  |  |
| **أجد أن وسائل تنظيم الأسرة المتاحة ذات جودة عالية وموثوقة** |  |  |  |  |  |

1. **The proportion of each FP type used among women**

**نسبة استخدام كل نوع من أنواع تنظيم الأسرة بين النساء**

**ما هي وسيلة منع الحمل التي تستخدمينها حاليًا؟**

| الوسائل المستخدمة | الاستخدام |
| --- | --- |
| اللولب النحاسي |  |
| اللولب الهرموني |  |
| الحبوب |  |
| الغرسات |  |
| الواقي الذكري |  |
| الحقن |  |
| وسائل أخرى |  |

1. **The level of women's compliance with contraceptive use**

| **مستوى التزام النساء باستخدام وسائل منع الحمل** | | | |  | |  | |  |  |
| --- | --- | --- | --- | --- | --- | --- | --- | --- | --- |
| العناصر | | نعم دائما | غالباً | أحيانا | | نادراً | | لا  أبدا | | | |
| استخدم وسائل منع الحمل في الوقت المحدد | |  |  |  | |  | |  | | | |
| لم أشتك من استخدام وسائل تنظيم الأسرة | |  |  |  | |  | |  | | | |
| استخدم طريقة معينة لتذكيري بتناول وسيلة منع الحمل في الوقت المحدد | |  |  |  | |  | |  | | | |
| أسأل مقدم الرعاية الخاص بي قبل التغيير أو تناول الحبوب | |  |  |  | |  | |  | | | |
| أتوقف عن استخدام وسائل تنظيم الأسرة بسبب بعض المضاعفات | |  |  |  | |  | |  | | | |
| أحاول استخدام الطريقة الموصوفة لتنظيم الأسرة بانتظام | |  |  |  | |  | |  | | | |
| عندما أنسى استخدام الطريقة الموصوفة لتنظيم الأسرة، أستخدم طريقة إضافية لمنع الحمل | |  |  |  | |  | |  | | | |
| استخدم وسائل منع الحمل في الوقت المناسب لتجنب الحمل أثناء استخدام الطريقة الموصوفة | |  |  |  | |  | |  | | | |
| حضور المواعيد المنتظمة مع مقدم الرعاية الصحية لمتابعة استخدام وسيلة منع الحمل | |  |  |  | |  | |  | | | |
| أقم بتغيير وسيلة منع الحمل بناءً على توصية من مقدم الرعاية الصحية | |  |  |  | |  | |  | | | |
| أستمر في استخدام وسيلة منع الحمل حتى إذا واجهتِ آثارًا جانبية خفيفة | |  |  |  | |  | |  | | | |
| أستمر باستخدام وسيلة منع الحمل حتى أثناء السفر أو التغيرات الكبيرة في الروتين اليومي | |  |  |  | |  | |  | | | |

1. **The role of HCPs in educating women about FP methods**

| **دور مقدمي الرعاية الصحية في تثقيف النساء حول أساليب تنظيم الأسرة من وجهه نظر السيدات** | | | | | |
| --- | --- | --- | --- | --- | --- |
| العناصر | موافق بشدة | موافق | محايد | غير موافق | غير موافق بشدة |
| مقدمي الرعاية الصحية مسؤولون عن تثقيف النساء حول وسائل منع الحمل |  |  |  |  |  |
| حصلت على معلومات كافية عن كل وسيلة لمنع الحمل لاختيار الطريقة التي تناسبني |  |  |  |  |  |
| لدي ثقة في جودة تثقيف الصحي حول وسائل منع الحمل التي يقدمها مقدمو الخدمات الصحية |  |  |  |  |  |
| من ضروري تصميم برامج التثقيف الصحي حول أساليب تنظيم الاسرة لتلبية احتياجات وتفضيلات السيدات |  |  |  |  |  |
| يتمتع المعلم الصحي بالقدرة على معالجة الأوهام والاساطير حول استخدام أساليب تنظيم الأسرة |  |  |  |  |  |
| لدى مقدمي الخدمات الصحية معرفة بالمضاعفات المحتملة لوسائل منع الحمل |  |  |  |  |  |
| أشعر بالراحة عند مناقشة الفوائد المحتملة لاستخدام تنظيم الاسرة مع مقدمي الخدمات الصحية |  |  |  |  |  |
| يحافظ مقدمو الرعاية الصحية على السرية وخصوصية المرأة عند تثقيف الصحي حول وسائل منع الحمل |  |  |  |  |  |
| من الضروري مناقشة شرح جميع الطرق المتاحة لتنظيم الاسرة في منشأة صحية قدر الإمكان |  |  |  |  |  |
| الإيماءات ولغة الجسد مهمة لتوصيل المعلومات بشكل جيد أثناء التثقيف الصحي حول وسائل منع الحمل |  |  |  |  |  |
| من الضروري أن تسأل مقدمي الخدمات الصحية عن تاريخك الطبي السابق لتحديد موانع الحمل المناسبة |  |  |  |  |  |
| من المرجح أن يساهم التثقيف الصحي في زيادة وعي المرأة بالمضاعفات التي تحدث عند استخدام أساليب تنظيم الأسرة |  |  |  |  |  |
| من الضروري استخدام الوسائل المرئية للمساعدة في شرح وسائل منع الحمل |  |  |  |  |  |
| من الضروري اخباري عن وسائل منع الحمل المتوفرة في المنشاة الصحية |  |  |  |  |  |
| يقدم مقدمي الرعاية الصحية إرشادات حول كيفية التصرف في حالة حدوث مضاعفات صحية عند استخدام وسائل منع الحمل |  |  |  |  |  |
| **مقدمي الرعاية الصحية يستخدمون لغة واضحة ومفهومة عند شرح وسائل منع الحمل** |  |  |  |  |  |
| مقدمي الرعاية الصحية يقدمون لي جميع الخيارات المتاحة لوسائل تنظيم الأسرة بما يتناسب مع وضعي الصحي والشخصي |  |  |  |  |  |
| يتم إشراك الزوج في جلسات التثقيف حول وسائل تنظيم الأسرة لتعزيز الفهم المشترك |  |  |  |  |  |
| التثقيف حول وسائل تنظيم الأسرة يجب أن يستمر بعد البدء في استخدام الوسيلة لضمان الاستخدام الأمثل. |  |  |  |  |  |

**S2:** Contraceptive use and health insurance status among participants

| **Contraceptive use and health insurance** | **Groups** | **N** | **%** |
| --- | --- | --- | --- |
| Have you ever used contraceptives | Yes | 255 | 70.8% |
| No | 105 | 29.2% |
| Do you have health insurance? | Yes | 257 | 71.4% |
| No | 103 | 28.6% |
| Do you have any chronic health conditions affecting your decision to use a contraceptive | Yes | 58 | 16.1% |
| No | 302 | 83.9% |
| Duration of contraceptive use | Please do not use it | 96 | 26.7% |
| Less than a year | 46 | 12.8% |
| 1-2 years | 94 | 26.1% |
| More than 3 years | 124 | 34.4% |

S3: Distribution of FP type uses among the study participants

| **FP type uses** | **Yes** | | **No** | |
| --- | --- | --- | --- | --- |
| **N** | **%** | **N** | **%** |
| Copper IUD | 78 | 21.7% | 282 | 78.3% |
| Hormonal IUD | 27 | 7.5% | 333 | 92.5% |
| Pills | 64 | 17.8% | 296 | 82.2% |
| Condom | 41 | 11.4% | 319 | 88.6% |
| Injection | 21 | 5.8% | 339 | 94.2% |
| Implant | 8 | 2.2% | 352 | 97.8% |
| Others | 31 | 8.6% | 329 | 91.4% |

S4: Relationship between socio-demographic factors and the level of access to FP methods among participants

| **Sociodemographic data** | **Categories** | **The level of access of FP methods** | | | **Statistical Analysis 1** | | | |
| --- | --- | --- | --- | --- | --- | --- | --- | --- |
| **Mean (Max=5)** | **SD** | **% Mean** | **T** | **F** | **P-value** | **Post Hoc** |
| Age (years) | Less than 18 | 3.87 | 0.27 | 77.40 |  | 35.848 | 0.000* | 18-30 and less than 18 > other groups* |
| 18-30 | 3.77 | 0.29 | 75.40 |  |  |  |
| 31-40 | 3.42 | 0.48 | 68.40 |  |  |  |
| 41-50 | 3.10 | 0.55 | 62.00 |  |  |  |
| Above 50 | 3.04 | 0.71 | 60.80 |  |  |  |
| Region | Khan-Younis | 3.48 | 0.46 | 69.60 |  | 2.031 | 0.133 |  |
| Deir al-Balah | 3.59 | 0.58 | 71.80 |  |  |  |  |
| Al-Zawayda | 3.62 | 0.25 | 72.40 |  |  |  |  |
| Level of education for women | Primary School or Less | 3.79 | 0.27 | 75.80 |  | 35.717 | 0.000* | Master's Degree or more < others* |
| Secondary School | 3.70 | 0.36 | 74.00 |  |  |  |
| Diploma | 2.97 | 0.68 | 59.40 |  |  |  |
| Bachelor's Degree | 3.26 | 0.51 | 65.20 |  |  |  |
| Master's Degree or more | 2.42 | 0.29 | 48.40 |  |  |  |
| Level of education for husband | Primary School or Less | 3.73 | 0.32 | 74.60 |  | 35.409 | 0.000* | Primary School or Less and Secondary School > others * |
| Secondary School | 3.69 | 0.38 | 73.80 |  |  |  |
| Diploma | 3.05 | 0.60 | 61.00 |  |  |  |
| Bachelor's Degree | 3.18 | 0.51 | 63.60 |  |  |  |
| Master's Degree or more | 3.02 | 0.64 | 60.40 |  |  |  |
| Occupation for women | Employed | 3.08 | 0.53 | 61.60 | 8.853 |  | 0.000* |  |
| Unemployed | 3.61 | 0.45 | 72.20 |  |  |  |  |
| Occupation for husband | Employed | 3.21 | 0.47 | 64.20 | 5.323 |  | 0.000* |  |
| Unemployed | 3.67 | 0.45 | 73.40 |  |  |  |  |
| Economic income (NIS) | Less than 1000 | 3.64 | 0.45 | 72.80 |  | 31.044 | 0.000* | More than 2000 < others* |
| 1000-1500 | 3.30 | 0.37 | 66.00 |  |  |  |
| 1600-2000 | 3.02 | 0.63 | 60.40 |  |  |  |
| More than 2000 | 2.57 | 0.25 | 51.40 |  |  |  |
| How long has your marriage been | Less than a year | 3.58 | 0.43 | 71.60 |  | 32.915 | 0.000* | More than 10 years < others |
| 1-5 years | 3.85 | 0.21 | 77.00 |  |  |  |
| 6-10 years | 3.76 | 0.26 | 75.20 |  |  |  |
| More than 10 years | 3.32 | 0.55 | 66.40 |  |  |  |
| Number of previous pregnancies | 3 or less | 3.56 | 0.53 | 71.20 |  | 1.624 | 0.199 |  |
| 4-6 | 3.47 | 0.48 | 69.40 |  |  |  |
| 7 or more | 3.58 | 0.48 | 71.60 |  |  |  |
| Number of previous deliveries | 2 or less | 3.55 | 0.51 | 71.00 |  |  |  |  |
| 3-4 | 3.46 | 0.48 | 69.20 |  | 1.114 | 0.329 |  |
| 5 or more | 3.55 | 0.51 | 71.00 |  |  |  |  |
| How many children do you currently have | 2 or less | 3.54 | 0.51 | 70.80 |  | 1.011 | 0.365 |  |
| 3-4 | 3.46 | 0.49 | 69.20 |  |  |  |  |
| 5 or more | 3.55 | 0.51 | 71.00 |  |  |  |  |
| Number of previous abortions | No | 3.57 | 0.59 | 71.40 |  | 0.385 | 0.681 |  |
| 1-3 | 3.51 | 0.49 | 70.20 |  |  |  |  |
| 4 or more | 3.57 | 0.41 | 71.40 |  |  |  |  |
